# Supplementary material for: Retinal organoid chip: engineering a physiomimetic oxygen gradient for optimizing long term culture of human retinal organoids
Source: Royal Society of Chemistry journal article supplement (doi:10.1039/d4lc00771a), 2024-12-03
Supplement: d4lc00771a1.pdf [file d4lc00771a1.pdf]

1  
2  
3  
4  
5  
6  
7  
8  
9  
10  
11  
12  
13  
14  
15  
16  
17  
18  
19  
20  
21  
22  
23  
24  
25

## SUPPLEMENTAL INFORMATION

### **Retinal Organoid Chip: Engineering a Physiomimetic Oxygen Gradient for Optimizing Long Term Culture of Human Retinal Organoids**

Emma Drabbe<sup>1,2</sup>, Daniel Pelaez<sup>\*1,2,3</sup>, Ashutosh Agarwal<sup>\*1,3,4</sup>

<sup>1</sup>Department of Biomedical Engineering, University of Miami, Coral Gables, FL

<sup>2</sup>Bascom Palmer Eye Institute, Department of Ophthalmology, University of Miami Miller School of  
Medicine, Miami, FL

<sup>3</sup>Sylvester Comprehensive Cancer Center, University of Miami Miller School of Medicine, Miami

<sup>4</sup>Desai Sethi Urology Institute, University of Miami Miller School of Medicine, Miami

#### **Corresponding Authors:**

Daniel Pelaez, Ph.D.

1638 NW 10th Ave. Miami, FL 33136

TEL: +1 (305) 482-4850, Email: dpelaez@miami.edu

Ashutosh Agarwal, Ph.D.

1951 NW 7th Ave #475 Miami FL 33136

TEL: +1 (305) 243-8925, E-mail: A.agarwal2@miami.edu

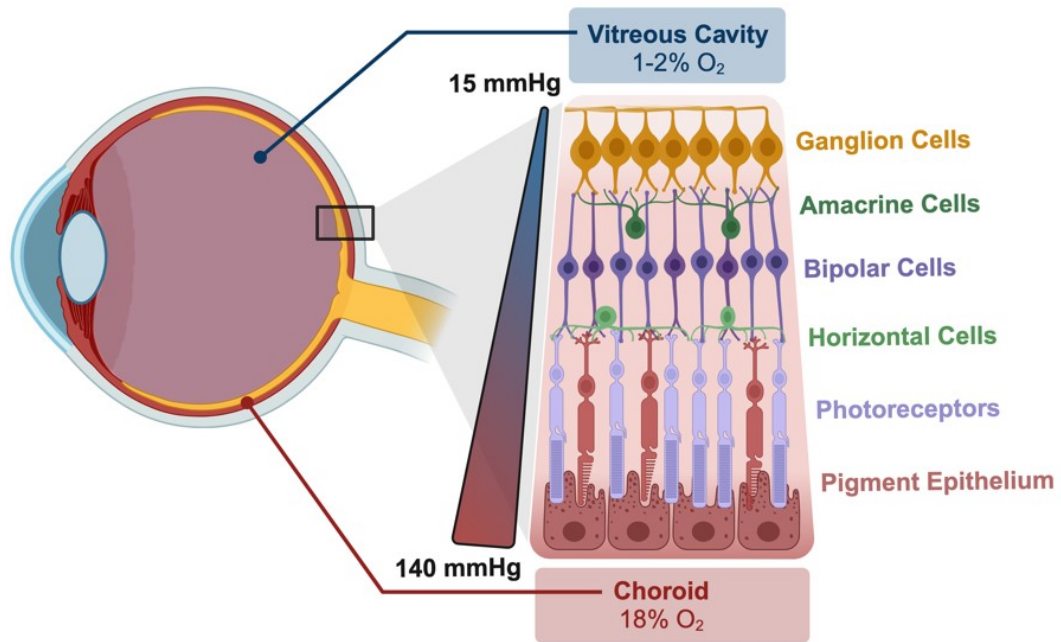

26

27 **Supplementary Figure 1.** A schematic of the human eye anatomy highlights the retina, which is  
 28 organized into distinct layers with various retinal cell phenotypes, situated between the hypoxic  
 29 vitreous cavity and the oxygenated choroid. This positioning leads to the establishment of a steep  
 30 oxygen gradient across the retinal tissue.

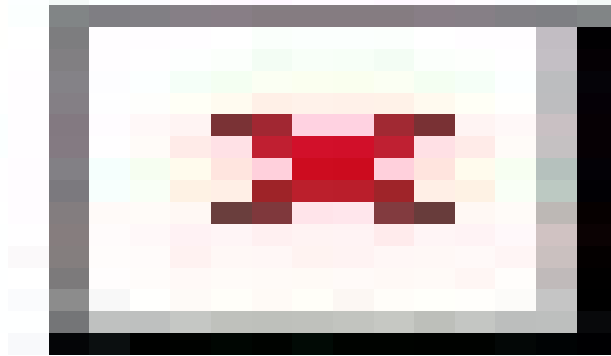

31  
32

33 **Supplementary Figure 2.** Dental Pulp Stem Cells (DPSC) reprogrammed for pluripotency were tested  
34 on pluripotency markers SOX2, OCT4 and SSEA4 with immunofluorescence staining. Both original  
35 DPSC derived iPSC line and a genetically modified iPSC line were found to be pluripotent.

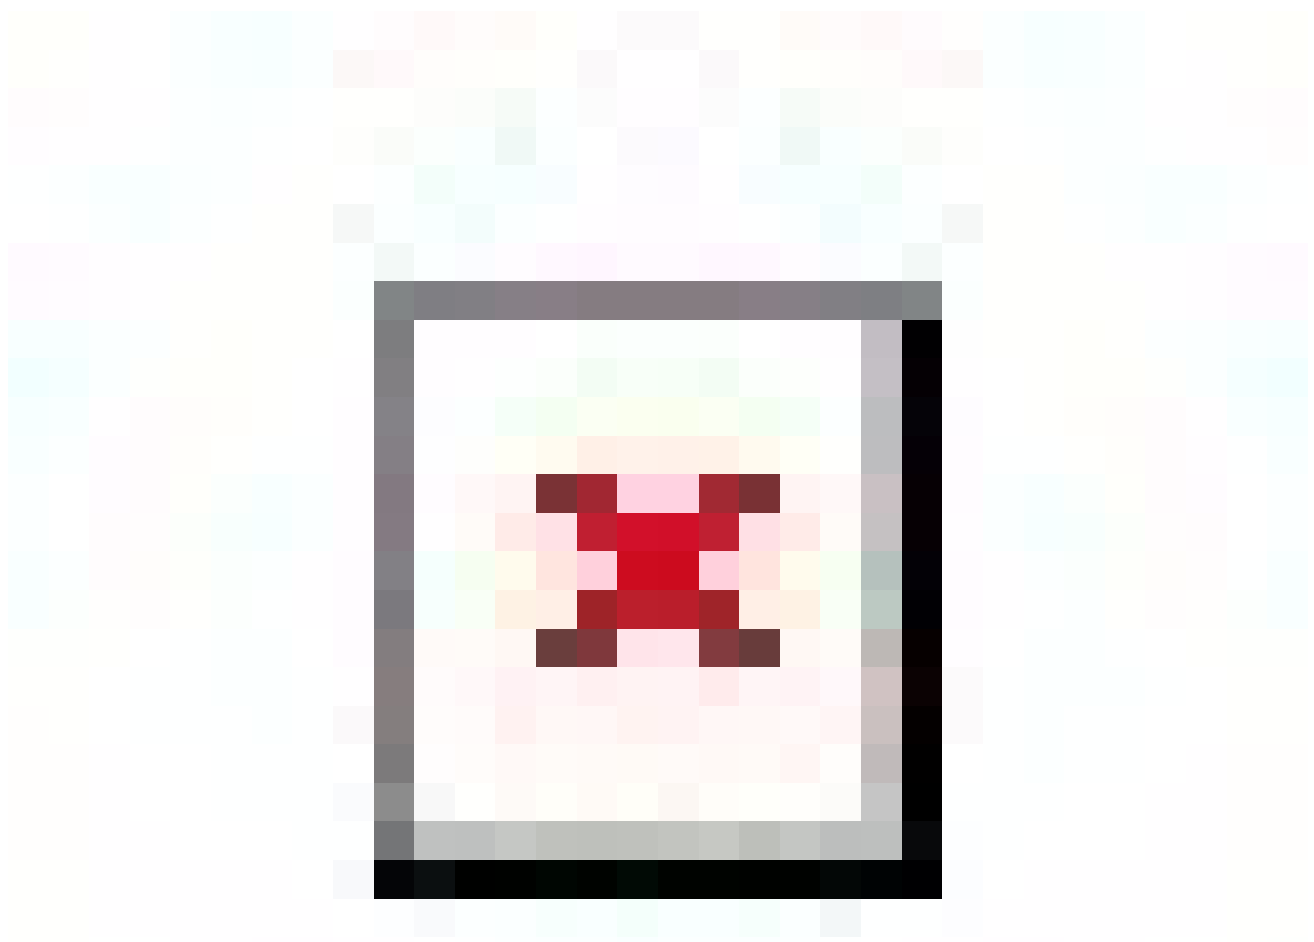

36  
37 **Supplementary Figure 3.** *The workflow of RBPMS quantification from immunofluorescent images*  
38 *using ImageJ, as described in the materials and methods.*

**Supplementary Table 1: Computational Modeling Parameters**

|                                    |                                                                                                                     |
|------------------------------------|---------------------------------------------------------------------------------------------------------------------|
| Physics & Study Type               | Laminar Flow; Stationary<br>Transport of Diluted Species; Time-dependent                                            |
| Oxygen Diffusion Coefficients      | Water: $3.0 \cdot 10^{-9} \text{ m}^2/\text{s}$<br>PFA: $4.56 \cdot 10^{-8} \text{ m}^2/\text{s}$                   |
| Retinal Organoid Consumption Rates | Oxygen: $-0.034091 \text{ mol}/(\text{m}^3 \cdot \text{s})$<br>Glucose: $1.0278\text{E-}11 \text{ kg/s}$            |
| Boundary Conditions Oxygen         | $C_{\text{water}} = 0.245 \text{ mol}/\text{m}^3$<br>$C_{\text{sodium sulfate channel}} = 0 \text{ mol}/\text{m}^3$ |
| Fluid Flow                         | $V = 50 \text{ }\mu\text{L}/\text{hour}$                                                                            |

41  
42

**Supplementary Table 2: Retinal Organoid Culture Media**

| <b>Neural Induction Media (50 mL)</b>        |                               |                                    |
|----------------------------------------------|-------------------------------|------------------------------------|
| 48.5 mL                                      | Gibco™ DMEM:F12               | Thermo Fisher Scientific #11320033 |
| 0.5 mL                                       | Non-Essential Amino Acids     | VWR #16777-186                     |
| 0.5 mL                                       | Gibco™ GlutaMAX™ Supplement   | Thermo Fisher Scientific #35050061 |
| 50 µL                                        | Heparin Solution              | Stemcell Tehcnologies # 07980      |
| 0.5 mL                                       | Gibco™ N-2 Supplement         | Thermo Fisher Scientific #17502048 |
| <b>Retinal Differentiation Media (50 mL)</b> |                               |                                    |
| 24 mL                                        | Gibco™ DMEM:F12               | Thermo Fisher Scientific #11320033 |
| 24 mL                                        | Gibco™ DMEM                   | Thermo Fisher Scientific #11965092 |
| 0.5 mL                                       | Non-Essential Amino Acids     | VWR #16777-186                     |
| 0.5 mL                                       | Gibco™ GlutaMAX™ Supplement   | Thermo Fisher Scientific #35050061 |
| 1.0 mL                                       | Gibco™ B27™ Supplement        | Thermo Fisher Scientific #12587010 |
| 0.5 mL                                       | Gibco™ Antibiotic-Antimycotic | Thermo Fisher Scientific #15240096 |

43
